# Supplementary material for: Strategy for Screening of Antioxidant Compounds from Two Ulmaceae Species Based on Liquid Chromatography-Mass Spectrometry
Source: PubMed Central journal article supplement (PMC6100396; doi:10.3390/molecules23071830), 2018-07-23
Supplement: molecules-23-01830-s001.pdf [file molecules-23-01830-s001.pdf]

## Supplementary Materials

Article

# A Strategy for Screening of Antioxidant Compounds from Two Ulmaceae Species based on Liquid Chromatography Mass Spectrometry (LC-MS)

Joong Yeun Won <sup>1</sup>, Su Young Son <sup>1</sup>, Sunmin Lee <sup>1</sup>, Digar singh <sup>1</sup> and Choong Hwan Lee <sup>1,\*</sup>

<sup>1</sup> Department of Bioscience and Biotechnology, Konkuk University, 120 Neungdong-ro, Gwangjin-gu, Seoul 05029, Korea; [tomkazasky@naver.com](mailto:tomkazasky@naver.com) (J.W.); [syson119@naver.com](mailto:syson119@naver.com) (S.S.); [duly123@naver.com](mailto:duly123@naver.com) (S.L.); [singhdigar@gmail.com](mailto:singhdigar@gmail.com) (D.S.)

\* Correspondence: Choong Hwan Lee (C.L.), [chlee123@konkuk.ac.kr](mailto:chlee123@konkuk.ac.kr), Tel.: +82-2-444-4290 (C.L.)

Received: date; Accepted: date; Published: date

Table S1. Used sample information in this study.

| No. | Family        | Taxon                              | Collected location in Korea                                     | Collected date |
|-----|---------------|------------------------------------|-----------------------------------------------------------------|----------------|
| 1   | Amaranthaceae | <i>Celosia argentea</i>            | Yongsan-ri, Buan-myeon, Gochang-gun, Jeollabuk-do               | 2015-09-18     |
| 2   |               | <i>Achyranthes japonica</i>        | Yeondong-ri, Imhoe-myeon, Jindo-gun, Jeollanam-do               | 2015-08-26     |
| 3   |               | <i>Celosia cristata</i>            | Gugok-ri, Bongyang-eup, Jecheon-si, Chungcheongbuk-do           | 2015-08-15     |
| 4   | Ulmaceae      | <i>Aphananthe aspera</i>           | Guanum-do, Cheonbu-ri, Buk-myeon, Ulleung-gun, Gyeongsangbuk-do | 2015-09-02     |
| 5   |               | <i>Zelkova serrata</i>             | Oji-ri, Ogok-myeon, Gokseong-gun, Jeollanam-do                  | 2015-06-03     |
| 6   | Lamiaceae     | <i>Isodon japonicus</i>            | Gyeseong-ri, Hanam-myeon, Hwacheon-gun, Gangwon-do              | 2015-09-08     |
| 7   |               | <i>Phlomis umbrosa</i>             | Donggeom-ri, Gilsang-myeon, Ganghwa-gun, Incheon                | 2015-08-12     |
| 8   |               | <i>Agastache rugosa</i>            | Myeong-wol-ri, Sanae-myeon, Hwacheon-gun, Gangwon-do            | 2015-08-11     |
| 9   |               | <i>Lamium amplexicaule</i>         | Daebuhdo, Daebuhdo-dong, Danwon-gu, Ansan-si, Gyeonggi-do       | 2015-04-06     |
| 10  | Liliaceae     | <i>Hemerocallis fulva</i>          | Papo-ri, Sangseo-myeon, Hwacheon-gun, Gangwon-do                | 2015-08-12     |
| 11  |               | <i>Smilacina japonica</i>          | Bangtaesan, Bangdong-ri, Girin-myeon, Inje-gun, Gangwon-do      | 2015-05-27     |
| 12  | Violaceae     | <i>Viola verecunda</i>             | Bangtaesan, Bangdong-ri, Girin-myeon, Inje-gun, Gangwon-do      | 2015-05-06     |
| 13  |               | <i>Viola mandshurica</i>           | Chundang-ri, Cheongil-myeon, Hoengseong-gun, Gangwon-do         | 2015-04-15     |
| 14  | Vitaceae      | <i>Vitis coignetiae</i>            | Namseo-ri, Seo-myeon, Ulleung-gun, Gyeongsangbuk-do             | 2015-09-02     |
| 15  |               | <i>Vitis ficifolia</i>             | Seokjeong-ri, Geumsan-myeon, Goheung-gun, Jeollanam-do          | 2015-08-14     |
| 16  |               | <i>Parthenocissus tricuspidata</i> | Nambuk-ri, Inje-eup, Inje-gun, Gangwon-do                       | 2016-10-08     |

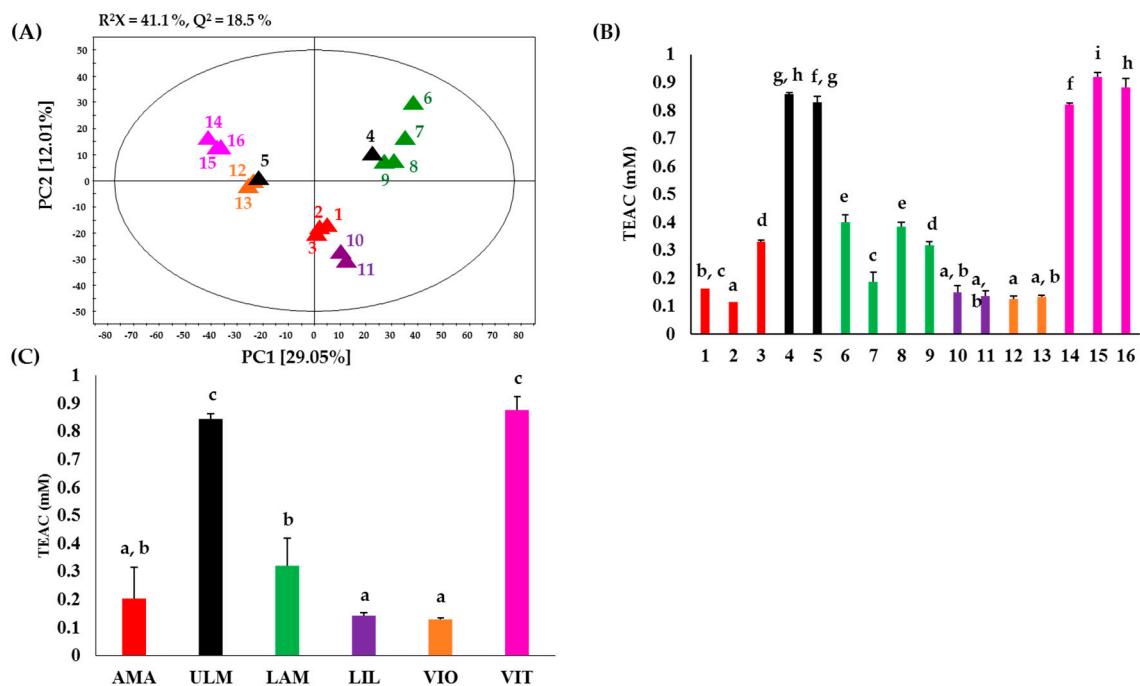

**Figure S1.** Multivariate statistical analysis and antioxidant activity for 16 indigenous plant species. (A) PCA score plot based on LC-MS datasets; (B) ABTS radical scavenging activity assay; (C) Average ABTS radical scavenging activities observed for each family; Here, AMA: Amaranthaceae, ULM: Ulmaceae, LAM: Lamiaceae, LIL: Liliaceae, VIO: Violaceae, VIT: Vitaceae. The plant species indicated with numbers (1-16) are elaborated and enlisted in Table 1. Bar indicates the standard deviation. Different letters indicates statistical differences among the observed values based Duncan's multiple range tests ( $p$ -value < 0.05), 'a', 'b', 'c', 'd', 'e', 'f', 'g', 'h' and 'i' describe statistically different.
